# Supplementary material for: Inference of Gene Regulatory Networks Incorporating Multi-Source Biological Knowledge via a State Space Model with L1 Regularization
Source: PubMed Central journal article supplement (PMC4146587; doi:10.1371/journal.pone.0105942), 2014-08-27
Supplement: pone.0105942.s001.pdf [file pone.0105942.s001.pdf]

## Supplement

### EM-algorithm for regularized-loglikelihood of VAR-SSM

In the Expectation-step,  $q(\boldsymbol{\theta}|\boldsymbol{\theta}_i)$  is calculated by

$$\begin{aligned}
q(\boldsymbol{\theta}|\boldsymbol{\theta}_i) = & -\frac{1}{2} \log |\Sigma_0| - \frac{1}{2} \text{tr}\{\Sigma_0^{-1}(\Sigma_{0|T} + (\mathbf{x}_{0|T} - \boldsymbol{\mu}_0)(\mathbf{x}_{0|T} - \boldsymbol{\mu}_0)')\} \\
& - \frac{T}{2} \log |Q| - \frac{1}{2} \text{tr}\{Q^{-1}(V_t - V_{lag}F' - FV_{lag}' + FV_{t-1}F' + FE_{t-1}G' + GE_{t-1}'F' - E_{lag}G' - GE_{lag}' \\
& + GZG' + G\mathbf{z}\mathbf{u}' + \mathbf{u}\mathbf{z}'G' + F\mathbf{s}_{t-1}\mathbf{u}' + \mathbf{u}\mathbf{s}_{t-1}'F' - \mathbf{s}_t\mathbf{u}' - \mathbf{u}\mathbf{s}_t' + T\mathbf{u}\mathbf{u}')\} \\
& - \frac{T}{2} \log |R| - \frac{1}{2} \text{tr}[R^{-1} \sum_{t=1}^T \{(\mathbf{y}_t - \mathbf{x}_{t|T})(\mathbf{y}_t - \mathbf{x}_{t|T})' + \Sigma_{t|T}'\}] \\
& - N(T + \frac{1}{2}) \log 2\pi - \sum_{n=1}^N \sum_{k=1}^N \lambda_n |A_{n,k}| - \sum_{n=1}^N \sum_{k=1}^M \lambda_n |G_{n,k}|, \tag{S1}
\end{aligned}$$

where

$$V_t = \sum_{t \in \mathcal{T}} (\Sigma_{t|T} + \mathbf{x}_{t|T} \mathbf{x}_{t|T}'), \tag{S2}$$

$$V_{lag} = \sum_{t \in \mathcal{T}} (\Sigma_{t,t-1|T} + \mathbf{x}_{t|T} \mathbf{x}_{t-1|T}'), \tag{S3}$$

$$V_{t-1} = \sum_{t \in \mathcal{T}} (\Sigma_{t-1|T} + \mathbf{x}_{t-1|T} \mathbf{x}_{t-1|T}'), \tag{S4}$$

$$\mathbf{s}_t = \sum_{t \in \mathcal{T}} \mathbf{x}_{t|T}, \tag{S5}$$

$$\mathbf{s}_{t-1} = \sum_{t \in \mathcal{T}} \mathbf{x}_{t-1|T}, \tag{S6}$$

$$E_{lag} = \sum_{t \in \mathcal{T}} \mathbf{x}_{t|T} \mathbf{z}_{t-1|T}', \tag{S7}$$

$$E_{t-1} = \sum_{t \in \mathcal{T}} \mathbf{x}_{t-1|T} \mathbf{z}_{t-1|T}', \tag{S8}$$

$$\mathbf{z} = \sum_{t \in \mathcal{T}} \mathbf{z}_{t-1|T}, \tag{S9}$$

$$Z = \sum_{t \in \mathcal{T}} \mathbf{z}_{t-1|T} \mathbf{z}_{t-1|T}'. \tag{S10}$$

In the Maximization-step,  $\boldsymbol{\theta}_i$  is updated to  $\boldsymbol{\theta}_{i+1}$  to be  $\boldsymbol{\theta}_{i+1} = \arg \max_{\boldsymbol{\theta}} q(\boldsymbol{\theta}|\boldsymbol{\theta}_i)$ . Let  $\mathbf{v}_{t,n}$ ,  $\mathbf{v}_{lag,n}$ ,  $\mathbf{v}_{t-1,n}$ ,  $\mathbf{e}_{t,n}$  and  $\mathbf{e}_{lag,n}$  set a transpose of  $n$ th row vector of  $V_t$ ,  $V_{lag}$ ,  $V_{t-1}$ ,  $E_{lag}$  and  $E_{t-1}$ , respectively. Further, set  $s_{t,n}$  and  $s_{t-1,n}$  as an  $n$ th element of  $\mathbf{s}_t$  and  $\mathbf{s}_{t-1}$ , and  $v_{t,n,k}$  and  $v_{t-1,n,k}$  as an  $n$ th row  $k$ th column element of  $V_t$  and  $V_{t-1}$ , respectively.

Then,  $\boldsymbol{\theta}$  is updated as

$$\mathbf{a}_n = \arg \min_{\mathbf{a}_n} \{ \mathbf{a}'_n V_{t-1} \mathbf{a}_n + 2(1 - d_n) \mathbf{v}'_{t-1,n} \mathbf{a}_n - 2\mathbf{v}'_{lag,n} \mathbf{a}_n + 2u_n \mathbf{s}'_{t-1} \mathbf{a}_n + 2\mathbf{g}'_n E'_{t-1} \mathbf{a}_n + 2q_n \sum_{k=1}^N \lambda_n |a_{n,k}| \}, \quad (\text{S11})$$

$$\mathbf{g}_n = \arg \min_{\mathbf{g}_n} \{ \mathbf{g}'_n Z \mathbf{g}_n + 2\mathbf{f}'_n E_{t-1} \mathbf{g}_n - 2\mathbf{e}'_{lag,n} \mathbf{g}_n + 2u_n \mathbf{z}' \mathbf{g}_n + 2q_n \sum_{k=1}^M \lambda_n |g_{n,k}| \}, \quad (\text{S12})$$

$$d_n = 1 - \frac{v_{t,n,n} - u_n s_{t-1,n} - \mathbf{v}'_{t-1,n} \mathbf{a}_n - \mathbf{g}'_n \mathbf{e}_{lag,n}}{v_{t-1,n,n}}, \quad (\text{S13})$$

$$\mathbf{u} = \frac{\mathbf{s}_t - F \mathbf{s}_{t-1} - G \mathbf{z}}{T}, \quad (\text{S14})$$

$$Q = \frac{1}{T} (V_t - V_{lag} F' - F V'_{lag} + F V_t F' + F E_{lag} G' + G E'_{lag} F' - E_t G' - G E_t + G Z G' + G \mathbf{z} \mathbf{u}' + \mathbf{u} \mathbf{z}' G' + F \mathbf{s}_{t-1} \mathbf{u}' + \mathbf{u} \mathbf{s}'_{t-1} F' - \mathbf{s}_t \mathbf{u}' - \mathbf{u} \mathbf{s}'_t + T \mathbf{u} \mathbf{u}'), \quad (\text{S15})$$

$$R = \frac{1}{T} \sum_{t \in \mathcal{T}_{obs}} \{ (\mathbf{y}_t - \mathbf{x}_{t|T})(\mathbf{y}_t - \mathbf{x}_{t|T})' + \Sigma_{t|T} \}, \quad (\text{S16})$$

where  $d_n$  is set 0 if  $d_n < 0$ .

### Active sets of parameters of gene regulation

Let  $\mathcal{A} = \{\mathcal{A}_1, \dots, \mathcal{A}_N\}$  and  $\mathcal{G} = \{\mathcal{G}_1, \dots, \mathcal{G}_N\}$ , where  $\mathcal{A}_n$  and  $\mathcal{G}_n$  be active sets of elements for  $\mathbf{a}_n$  and  $\mathbf{g}_n$ , *i.e.*,  $\forall \{a_{n,k} \neq 0\} \in \mathcal{A}_n$  and  $\forall \{g_{n,k} \neq 0\} \in \mathcal{G}_n$  for  $k = 1, \dots, N$ , respectively. The descriptions of  $\mathcal{A}_n$  and  $\mathcal{G}_n$  stand for an  $|\mathcal{A}_n| \times |\mathcal{A}_n|$  matrix or an  $|\mathcal{A}_n|$  dimensional vector and a  $|\mathcal{G}_n| \times |\mathcal{G}_n|$  matrix or a  $|\mathcal{G}_n|$  dimensional vector, respectively. Then, Eqs. (S11) and (S12) are differentiated to satisfy

$$(S11) \Leftrightarrow \mathbf{a}_n^{\mathcal{A}_n} = V_{t-1}^{\mathcal{A}_n} (\mathbf{v}_{lag,n}^{\mathcal{A}_n} - (1 - d_n) \mathbf{v}_{t-1,n}^{\mathcal{A}_n} - u_n \mathbf{s}_{t-1}^{\mathcal{A}_n} - E_{t-1}^{\mathcal{A}_n} \mathbf{g}_n^{\mathcal{A}_n} - q_n \lambda_n \text{sign}(\mathbf{a}_n^{\mathcal{A}_n})), \quad (\text{S17})$$

$$(S12) \Leftrightarrow \mathbf{g}_n^{\mathcal{G}_n} = -Z^{\mathcal{G}_n} (\mathbf{e}_{lag,n}^{\mathcal{G}_n} - E_{t-1}^{\mathcal{G}_n} \mathbf{f}_n^{\mathcal{G}_n} - u_n \mathbf{z}^{\mathcal{G}_n} - q_n \lambda_n \text{sign}(\mathbf{g}_n^{\mathcal{G}_n})), \quad (\text{S18})$$

where *sign* means a sign vector consisting positive (+1) or negative (-1) values.
