# Supplementary material for: Inference of Gene Regulatory Networks Incorporating Multi-Source Biological Knowledge via a State Space Model with L1 Regularization
Source: PubMed Central journal article supplement (PMC4146587; doi:10.1371/journal.pone.0105942), 2014-08-27
Supplement: pone.0105942.s005.pdf [file pone.0105942.s005.pdf]

## Supporting Information Model S4

### Corticosteroid kinetics/pharmacodynamics

According to Sun *et al.* (1998), we consider the plasma concentration of corticosteroid as

$$\text{MPL} = C_1 \cdot e^{-\lambda_1 t} + C_2 \cdot e^{-\lambda_2 t}, \quad (\text{SI-1})$$

where  $C_1$  and  $C_2$  are intercepts,  $\lambda_1$  and  $\lambda_2$  are the rate of discharges. These values are set as  $C_1 = 39,130$  (ng/ml),  $C_2 = 12,670$  (ng/ml),  $\lambda_1 = 7.54$  ( $\text{h}^{-1}$ ) and  $\lambda_2 = 1.20$  ( $\text{h}^{-1}$ ). Using this corticosteroid pharmacokinetic model, Yao *et al.* (2007) established the corticosteroid pharmacodynamic model in rat muscle described by

$$\frac{d\text{mRNA}_R}{dt} = k_{s\_Rm} \cdot \left\{ 1 - \frac{\text{DR}_N}{\text{IC}_{50\_Rm} + \text{DR}_N} \right\} - k_{d\_Rm} \cdot \text{mRNA}_R, \quad (\text{SI-2})$$

$$\frac{dR}{dt} = k_{s\_R} \cdot \text{mRNA}_R + R_f \cdot k_{re} \cdot \text{DR}_N - k_{on} \cdot \text{MPL} \cdot R - k_{d\_R} \cdot R, \quad (\text{SI-3})$$

$$\frac{dDR}{dt} = k_{on} \cdot \text{MPL} \cdot R - k_T \cdot \text{DR}, \quad (\text{SI-4})$$

$$\frac{d\text{DR}_N}{dt} = k_T \cdot \text{DR} - k_{re} \cdot \text{DR}_N, \quad (\text{SI-5})$$

where  $\text{mRNA}_R$  is the concentration of mRNA of the receptor protein,  $R$  is the concentration of the receptor protein,  $DR$  is the concentration of the drug-receptor complex,  $\text{DR}_N$  is the concentration of the drug-receptor complex in nucleus, and *Synthesis* and *Degradation* mean synthesis and degradation processes, respectively. These parameter values are concluded in Table 1. More details can be referred to Yao *et al.* (2007).

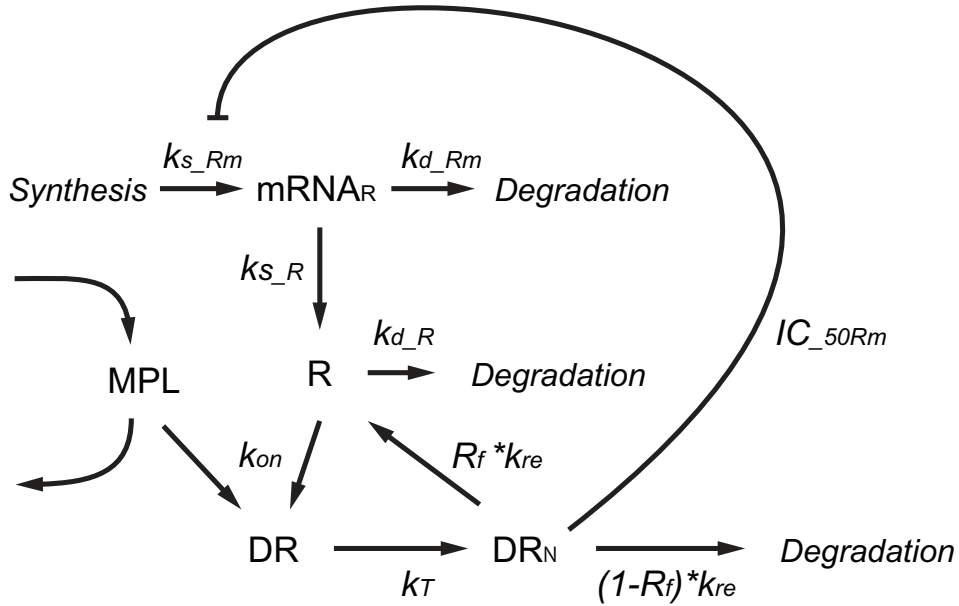

Figure 1: **Corticosteroid pharmacokinetics/dynamics in rat muscle.** This figure illustrates the corticosteroid pharmacodynamics in rat muscle established by Yao *et al.* (2007).

Table 1: The values of the parameters for corticosteroid pharmacodynamics illustrated in Figure 1.

| parameter               | value   |
|-------------------------|---------|
| $k_{s_{Rm}}$ (fmol/g/h) | 0.416   |
| $k_{d_{Rm}}$ (1/h)      | 0.139   |
| $k_{s_R}$ (fmol/g/h)    | 0.777   |
| $k_{d_R}$ (1/h)         | 0.0356  |
| $k_{on}$ (1/nmol/h)     | 0.00269 |
| $k_T$ (1/T)             | 90      |
| $k_{re}$ (1/h)          | 0.618   |
| $R_f$                   | 0.720   |
| $IC_{50Rm}$ (fmol/mg)   | 0.911   |
| $GR_{mRNA}^0$ (fmol/g)  | 2.99    |
| $GR^0$ (fmol/mg)        | 65.3    |
